# Supplementary material for: Effectiveness of conditional cash transfers (Afya credits incentive) to retain women in the continuum of care during pregnancy, birth and the postnatal period in Kenya: a cluster-randomised trial
Source: HighWire-hosted journal article supplement (doi:10.1136/bmjopen-2021-055921), 2022-01-01

**Figure S1** Success or failure of prompt payment in individual women (● at 1 or 0), the overall success proportion (blue line) and a 31-day moving average (red line) divided by control and intervention clinics.

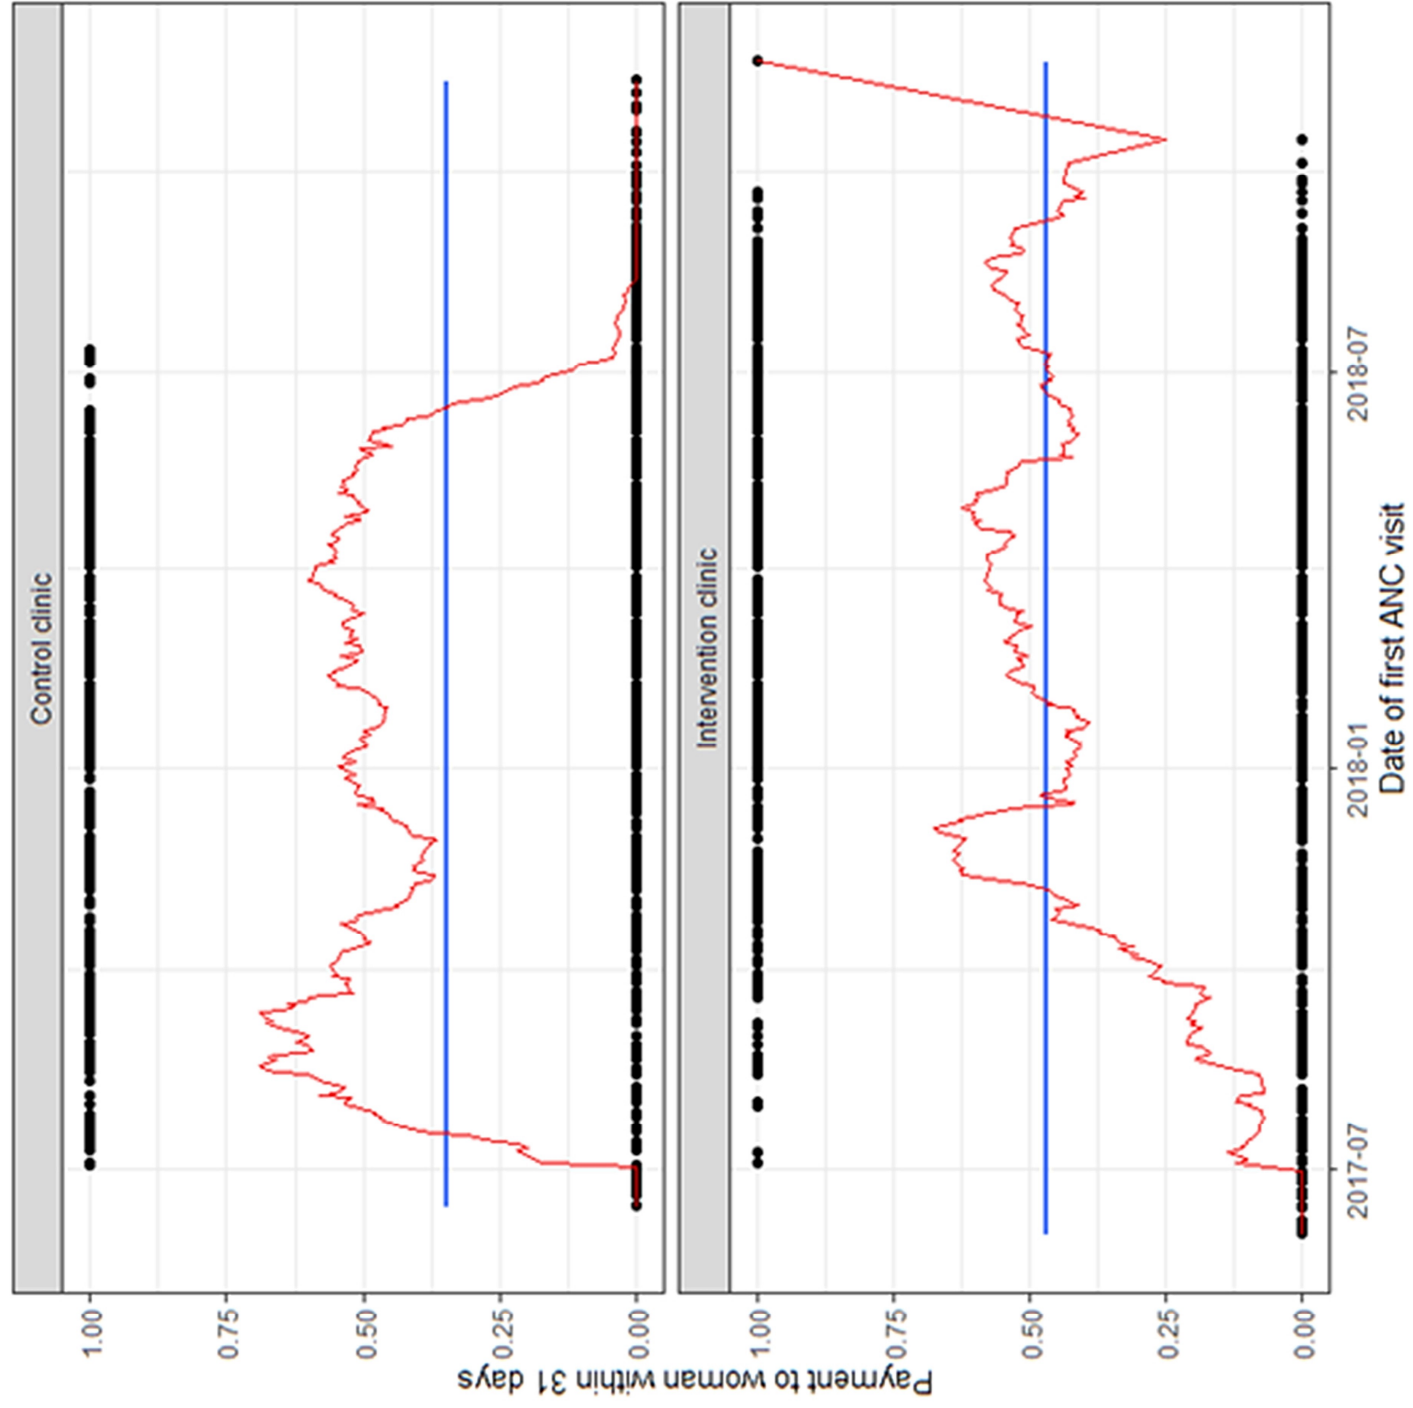

Supplement: bmjopen-2021-055921supp002_data_supplement.pdf [file bmjopen-2021-055921supp002_data_supplement.pdf]
